# Supplementary material for: The Lectin Receptor Kinase LecRK-I.9 Is a Novel Phytophthora Resistance Component and a Potential Host Target for a RXLR Effector
Source: PubMed Central journal article supplement (PMC3068997; doi:10.1371/journal.ppat.1001327), 2011-03-31

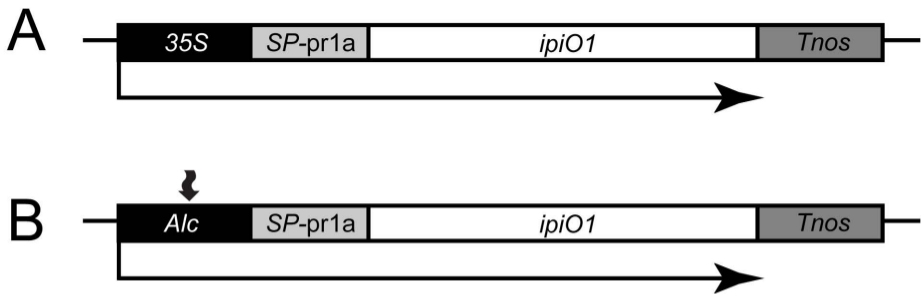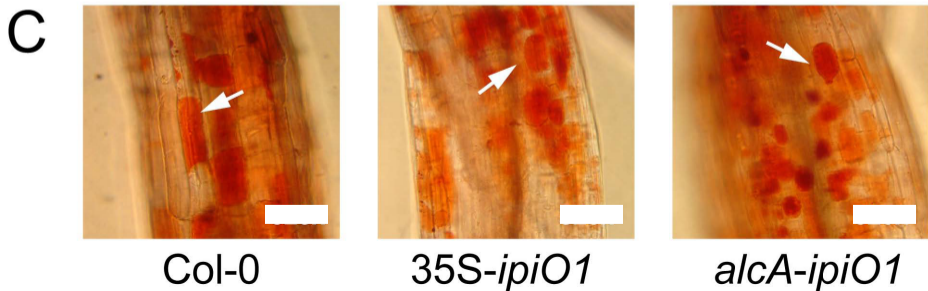

Supplement: ppat.1001327.s002.pdf [file ppat.1001327.s002.pdf]
